# Supplementary material for: Diagnosing Dissolved Organic Carbon Simulation of SWAT-C model Using Machine Learning Approaches
Source: Copernicus journal article supplement (doi:10.5194/egusphere-2025-5503), 2025-12-27
Supplement: Supplementary file 1 [file egusphere-2025-5503-supplement.pdf]

1 *Supplementary of*

2

3 **Diagnosing Dissolved Organic Carbon Simulation of**  
4 **SWAT-C model by Coupling Machine Learning**  
5 **approaches**

6

7 **Zehong Huang et.al**

8 *Correspondence to:* Yongshuo H. Fu (Email: yfu@bnu.edu.cn);

9

10

11

12

13

14

15

16

17

18

19

20

21

22

23

## **Introduction**

This supplementary file provides additional technical details to support the main manuscript. It includes descriptions of the spatial characteristics, parameterization, and calibration scheme of the Yalong River Basin, as well as a comparison of the machine learning methods applied in the study. Further information is also provided on the ML model framework, algorithm principles, and hyperparameter optimization. In addition, a SHAP-based analysis is presented to illustrate the individual effects of the vegetation module and relative humidity on model outputs. These materials aim to enhance the clarity, transparency, and reproducibility of our modeling approach.

### **Text S1. Spatial Characteristics, Parameterization, and Calibration Scheme of the Yalong River Basin**

In the SWAT-C modeling process, a 10% area threshold was applied to filter land use, soil, and slope combinations within each sub-basin. Consequently, the Yalong River Basin was delineated into 21 sub-basins comprising a total of 323 hydrological response units. As illustrated in Figure S1, the Yalong River flows from north to south, with an average basin slope of approximately 20°, and local maximum slopes approaching 90°. The basin exhibits considerable heterogeneity in soil distribution, predominantly featuring lithic pergelic soils (LPi), highly active leached soils (LVh), and cryic cambisols (CMi). In terms of land cover, grasslands and forests are the primary land use types, occupying approximately 58% and 36% of the total basin area, respectively.

The 2022 release of the SWAT-C model was employed in this study (Yang and Zhang, 2016; Zhang et al., 2013). Parameter sensitivity analysis and model calibration were conducted using SWAT-CUP. The final parameter values and sensitivity analysis results for the Yalong River basin are summarized in Table S3.

### **Text S2. Comparison of Machine Learning Methods**

This study compared machine learning methods commonly applied in hydrological and carbon-related research, as summarized in the Table S1. Based on their performance in previous studies, eight well-performing machine learning algorithms were selected: Convolutional Neural

Network (CNN), Support Vector Regression (SVR), Extreme Gradient Boosting (XGBOOST), Multi-Layer Perceptron (MLP), and four LSTM-based variants—Vanilla LSTM (V-LSTM), Stacked LSTM (St-LSTM), Bidirectional LSTM (Bi-LSTM), and Convolutional LSTM (Cv-LSTM).

### **Text S3. ML Model Framework, Algorithm Principles, and Hyperparameter Optimization**

All machine learning (ML) models in this study were developed on the Python 3.9.20 platform. All LSTM-based models were implemented using PyTorch 2.10.1, while SVR, MLP, CNN, and XGBOOST models were constructed using Scikit-learn 1.5.2. Hyperparameter optimization for all ML models was conducted using Bayesian optimization via the Optuna framework, with a pre-training iteration count of 6000 and 200 Bayesian trials. Additionally, 20% of the training data was randomly selected for validation.

Through comparative analysis of SWAT-C-based coupled models, the optimal DOC simulation strategy was identified. The core principles of each algorithm are summarized as follows:

**CNN:** Inspired by biological vision mechanisms (Liu et al., 2021), CNN uses three key feature extraction mechanisms—local receptive fields, weight sharing, and subsampling—to efficiently learn spatial patterns. It is particularly suitable for recognizing spatial structures in hydrological and geographical data (LeCun et al., 1989).

**SVR:** As a representative of statistical learning theory (Cortes and Vapnik, 1995), SVR adopts the structural risk minimization principle to control model complexity. By applying kernel functions, it maps nonlinear problems from low-dimensional to high-dimensional spaces, exhibiting strong generalization in hydrological forecasting (Belayneh et al., 2014; Piri et al., 2023).

**XGBOOST:** This algorithm optimizes the loss function using second-order Taylor expansion and incorporates regularization terms to control model complexity. Its parallel computing capabilities significantly improve the efficiency of gradient boosting algorithms, making it advantageous for modeling non-stationary hydrological data.

MLP: As a typical architecture of artificial neural networks, MLP establishes input-output mappings through nonlinear transformations in hidden layers. Its fully connected structure has been widely applied in streamflow simulation (Singh et al., 2012; Wang and Lu, 2006).

V-LSTM: The vanilla LSTM uses gated mechanisms (input, forget, and output gates) to regulate information flow and address the vanishing gradient problem in traditional RNNs (Deulkar et al., 2025).

St-LSTM: The stacked LSTM enhances model expressiveness through layer-wise feature abstraction, making it suitable for complex hydrological time series modeling (Mirzaei et al., 2021).

Bi-LSTM: This model employs bidirectional information flow to capture both forward and backward dependencies in time series data, improving DOC dynamic simulation accuracy (Zhang et al., 2025).

Cv-LSTM: By integrating CNN's spatial feature extraction with LSTM's temporal modeling, Cv-LSTM enables joint learning of spatiotemporal features in hydrological processes (Yuan et al., 2022).

The hyperparameter optimization results for each algorithm are summarized as Table S2.

#### **Text S4. SHAP Based Single-Feature Analysis of the Vegetation Module and Relative Humidity**

SHAP single-feature analyses were conducted for LAI and RH, as illustrated in Figure S2. The results reveal that LAI exerts a negative effect on the coupled model, with relatively limited temporal variability. In contrast, RH also exhibits a negative influence on the model, but shows considerable variability over time.

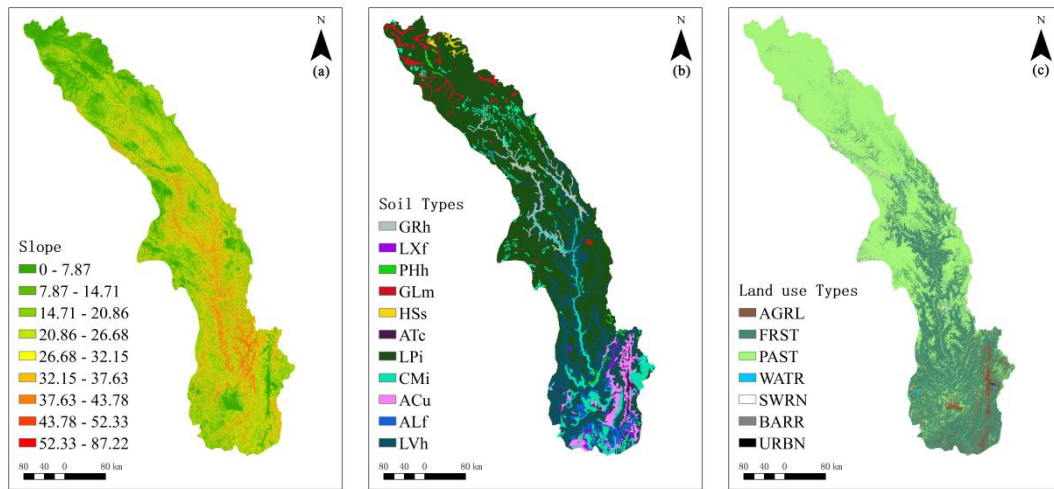

**Figure S1.** Spatial characteristics of the Yalong River Basin. (a) slope, (b) soil types, and (c) land use of the Yalong River Basin.

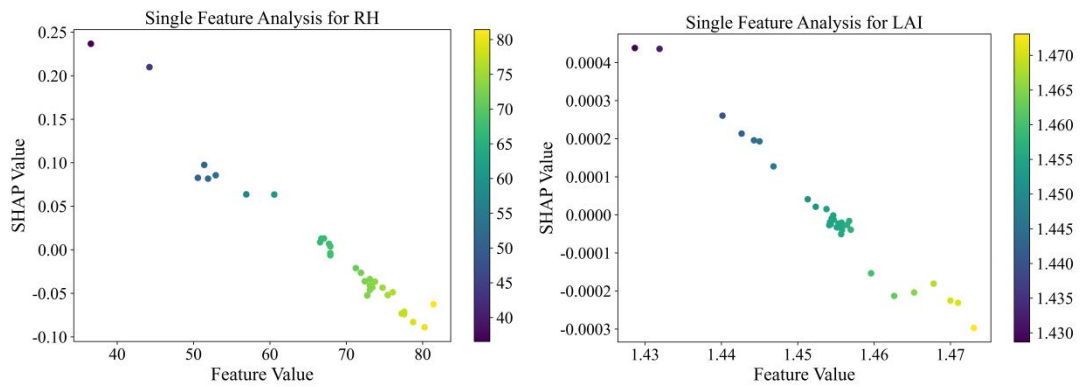

**Figure S2.** SHAP dependence plots for single-feature analysis of RH and LAI. These plots illustrate how variations in RH and LAI values influence their SHAP values, reflecting their individual impacts on the model's prediction of DOC. The color gradient represents the magnitude of feature values.

**Table S1.** Comparison of Machine Learning Applications in Hydrology.

| Ref.                     | Modeling techniques compared | Input variables                                  | Output variables | Best model |
|--------------------------|------------------------------|--------------------------------------------------|------------------|------------|
| (Liu et al., 2021)       | XGBOOST, SVM, ANN            | POC                                              | POC              | XGBOOST    |
| (Yi et al., 2023)        | DTR, GBR, LR, RFR, SVR       | DOM composition                                  | DOM              | SVR        |
| (Liang et al., 2023)     | SVR, XGBOOST, RF, LSTM       | Streamflow                                       | Streamflow       | LSTM       |
| (Khosravi et al., 2022)  | CNN, RF, ANFIS, SVR, MLP     | Precipitation                                    | Streamflow       | CNN        |
| (Khairudin et al., 2020) | ANN, SVR, DT, RFA, LSTM      | Rainfall,                                        | Rainfall         | LSTM       |
| (Maußner et al., 2025)   | LS, DT, KNN, SVR, RF, LSTM   | Water demand, Calendar input, Weather parameters | Water demand     | SVR, RF    |
| (Rahimzad et al., 2021)  | LR, MLP, SVM, LSTM           | Precipitation, Streamflow                        | Streamflow       | LSTM       |

**Table S2.** The hyperparameter of ML.

| ML type | Hyperparameters  | Value                  |
|---------|------------------|------------------------|
| CNN     | n_filters        | 81                     |
|         | kernel_size      | 2                      |
|         | n_dense          | 57                     |
|         | learning_rate    | 0.0022486618511447297  |
|         | look_back        | 5                      |
|         | C                | 36.40872092554611      |
| SVR     | epsilon          | 0.0007796103050027225  |
|         | gamma            | auto                   |
|         | kernel           | poly                   |
|         | look_back        | 18                     |
| XGBOOST | n_estimators     | 324                    |
|         | max_depth        | 5                      |
|         | learning_rate    | 0.023006063654684675   |
|         | subsample        | 0.5386606459539173     |
|         | colsample_bytree | 0.9433033312130754     |
|         | gamma            | 0.029017276570926617   |
|         | reg_alpha        | 0.00019354992590110747 |
|         | reg_lambda       | 0.05586083835565143    |

|         |               |                       |
|---------|---------------|-----------------------|
| MLP     | look_back     | 16                    |
|         | look_back     | 3                     |
|         | n_layers      | 2                     |
|         | n_units       | 82                    |
|         | dropout_rate  | 0.09661161287007619   |
|         | learning_rate | 0.008830715997276343  |
| V-LSTM  | look_back     | 10                    |
|         | lstm_units    | 67                    |
|         | dense_units   | 62                    |
|         | dropout_rate  | 0.11795608570064298   |
|         | learning_rate | 0.0022638192384822464 |
|         | look_back     | 5                     |
| St-LSTM | n_layers      | 2                     |
|         | dense_units   | 95                    |
|         | dropout_rate  | 0.21328331790576532   |
|         | learning_rate | 0.0030991349634583948 |
|         | look_back     | 3                     |
|         | filters       | 42                    |
| Cv-LSTM | kernel_size   | 3                     |
|         | lstm_units    | 61                    |
|         | learning_rate | 0.0022511362507718993 |
|         | dense_units   | 63                    |
|         | look_back     | 1                     |
|         | lstm_units    | 64                    |
| Bi-LSTM | dense_units   | 30                    |
|         | dropout_rate  | 0.2047821669899484    |
|         | learning_rate | 0.0032213437409123447 |
|         | epochs        | 21                    |
|         | batch_size    | 60                    |
|         |               |                       |

**Table S3.** SWAT-C calibration results for YLR.

| Parameter | Change | Calibration range | Calibrated value | Definition | T-Stat/<br>P-Value |
|-----------|--------|-------------------|------------------|------------|--------------------|
|-----------|--------|-------------------|------------------|------------|--------------------|

|                    |          |             |             |                                                                                      |             |
|--------------------|----------|-------------|-------------|--------------------------------------------------------------------------------------|-------------|
| v__CH_K1.sub       | Replace  | (0,300)     | 107.25<br>0 | Effective hydraulic conductivity in tributary channel alluvium                       | 15.72/0.04  |
| v__CH_K2.rte       | Replace  | (0,500)     | 253.75<br>0 | Effective hydraulic conductivity in main channel alluvium                            | 16.27/0.04  |
| v__CH_COV1.rte     | Replace  | (-0.05,0.6) | 0.368       | Channel erodibility factor                                                           | 2.55/0.24   |
| v__CH_COV2.rte     | Replace  | (-0.01,1)   | 0.513       | Channel cover factor                                                                 | -14.25/0.04 |
| v__USLE_P.mgt      | Replace  | (-0.5,0.6)  | 0.548       | USLE support practice factor                                                         | -17.91/0.04 |
| r__SOL_K().sol     | Relative | (-1,1)      | -0.605      | Saturated hydraulic conductivity                                                     | -15.96/0.04 |
| v__CH_N2.rte       | Replace  | (-0.01,0.3) | 0.047       | Manning's "n" value for the main channel                                             | -17.18/0.04 |
| v__ALPHA_BNK.rte   | Replace  | (0,1)       | 0.483       | Baseflow alpha factor for bank storage                                               | 17.54/0.04  |
| v__GW_DELAY.gw     | Replace  | (0,500)     | 31.250      | Groundwater delay (days)                                                             | -17.71/0.04 |
| v__CANMX.hru       | Replace  | (0,100)     | 39.500      | Maximum canopy storage                                                               | 5.66/0.11   |
| v__BIOMIX.mgt      | Replace  | (0,1)       | 0.385       | Biological mixing efficient                                                          | -16.99/0.04 |
| r__CN2.mgt         | Relative | (-1,1)      | 0.415       | SCS runoff curve number f                                                            | -8.33/0.08  |
| v__SPEXP.bsn       | Replace  | (1,1.5)     | 1.146       | Exponent parameter for calculating sediment re-entrained in channel sediment routing | 16.53/0.04  |
| v__ESCO.hru        | Replace  | (0,1)       | 0.175       | Soil evaporation compensation factor                                                 | 5.13/0.12   |
| v__LAT_SED.hru     | Replace  | (0,5000)    | 883.33<br>3 | Sediment concentration in lateral flow and groundwater flow                          | -14.59/0.04 |
| v__SED_CON.hr<br>u | Replace  | (0,5000)    | 783.33<br>3 | Sediment concentration in runoff, after urban BMP is                                 | -13.49/0.05 |

|                      |          |               |              |                                                                                                                          |             |
|----------------------|----------|---------------|--------------|--------------------------------------------------------------------------------------------------------------------------|-------------|
|                      |          |               |              | applied                                                                                                                  |             |
| v__CH_BNK_KD.rte     | Replace  | (0,3.75)      | 2.938        | Erodibility of channel bank sediment by jet test (cm <sup>3</sup> /N-s)                                                  | 14.85/0.04  |
| v__CH_BED_KD.rte     | Replace  | (0,3.75)      | 1.688        | Erodibility of channel bed sediment by jet test (cm <sup>3</sup> /N-s)                                                   | 20.15/0.03  |
| v__CH_BNK_TC.rte     | Replace  | (0,400)       | 156.00<br>0  | Critical shear stress of channel bank (N/m <sup>2</sup> )                                                                | 14.76/0.04  |
| v__CH_BED_TC.rte     | Replace  | (0,400)       | 169.33<br>3  | Critical shear stress of channel bed (N/m <sup>2</sup> )                                                                 | 12.14/0.05  |
| v__CH_BNK_D50.rte    | Replace  | (1,10000<br>) | 7966.8<br>71 | D50 Median particle size diameter of channel bank sediment                                                               | -9.66/0.07  |
| v__CH_BED_D50.rte    | Replace  | (1,10000<br>) | 8033.5<br>30 | D50 Median particle size diameter of channel bed sediment                                                                | -19.74/0.03 |
| r__SPCON.bsn         | Relative | (0,1)         | 0.994        | Linear parameter for calculating the maximum amount of sediment that can be re-entrained during channel sediment routing | -10.81/0.06 |
| r__EROS_SPL.bs<br>n  | Relative | (0.9,3.1)     | 1.074        | Splash erosion coefficient for soil detachment by rainfall                                                               | -7.31/0.09  |
| r__RILL_MULT.<br>bsn | Relative | (0.5,2)       | 0.930        | Multiplier to USLE_K for soil susceptible to rill erosion                                                                | 16.03/0.04  |
| r__SOL_BD().sol      | Relative | (0,1)         | 0.462        | Moist bulk density.                                                                                                      | 23.02/0.03  |
| r__HRU_SLP.hru       | Relative | (0,1)         | 0.828        | Average slope steepness                                                                                                  | -12.72/0.05 |
| v__GWQMN.gw          | Replace  | (0,5000)      | 1012.5       | Threshold depth of water in the shallow aquifer required for return flow to occur (mm)                                   | -18.25/0.03 |

|                          |         |                  |              |                               |             |             |
|--------------------------|---------|------------------|--------------|-------------------------------|-------------|-------------|
| v_peroc_DOC_pa<br>ra.tes | Replace | (0,1)            | 0.011        | DOC<br>coefficient            | percolation | -19.31/0.03 |
| v_part_DOC_para<br>.tes  | Replace | (4000,<br>10000) | 5003.3<br>88 | organic carbon<br>coefficient | partition   | -20.26/0.03 |

**Table S4.** Specific locations of the SWAT-C modules

| Data Name                        | Definition                                                                                  | SWAT-C Module                    | Locations                                                                               |
|----------------------------------|---------------------------------------------------------------------------------------------|----------------------------------|-----------------------------------------------------------------------------------------|
| FLOW_OUT                         | Streamflow output                                                                           | Runoff module                    | surface_change.f,<br>surfst_h2o_change.f,<br>wattable.f, etc.                           |
| SED_OUT                          | Sediment output                                                                             | Sediment module                  | latsed.f,<br>bacteria.f,<br>cfactor_change.f, etc.                                      |
| DOC_Simulate                     | Simulated total DOC                                                                         | Carbon cycle module              | orgncswat_change.f,<br>gw_doc_new.f,<br>substor_change.f,<br>subbasin_change.f,<br>etc. |
| BIOM                             | Biomass                                                                                     | Biomass module                   | plantmod_change.f,<br>grow_change.f                                                     |
| ET                               | Evapotranspiration                                                                          | Evapotranspiration<br>module     | etpot_change.f,<br>etact_change.f                                                       |
| TOT_P                            | Total phosphorus output                                                                     | Pollutant transport<br>module    | pestlch.f, pestw.f,<br>pesty.f, nminrl.f,<br>solp_change.f, etc.                        |
| LAI                              | Leaf area index                                                                             | Vegetation growth<br>module      | plantmod_change.f,<br>grow_change.f                                                     |
| SW                               | Soil water content                                                                          | Soil moisture module             | percmain.f                                                                              |
| PCP, RH, TMAX,<br>TMIN, SR, WIND | Precipitation, Relative<br>humidity, Max/Min<br>Temperature, Solar<br>radiation, Wind speed | Meteorological<br>forcing module | pmeas.f, hmeas.f,<br>tmeas.f, smeas.f,<br>wmeas.f,                                      |

## References

Belayneh, A., Adamowski, J., Khalil, B., and Ozga-Zielinski, B.: Long-term SPI drought forecasting in the Awash River Basin in Ethiopia using wavelet neural network and wavelet support vector regression models, *Journal of Hydrology*, 508, 418–429, <https://doi.org/10.1016/j.jhydrol.2013.10.052>, 2014.

Cortes, C. and Vapnik, V.: Support-vector networks, *Mach. Learn.*, 20, 273–297, <https://doi.org/10.1007/BF00994018>, 1995.

Deulkar, A. M., Dixit, P. R., Londhe, S. N., and Jain, R. K.: Comparative assessment of artificial neural networks (ANNs), long short term memory network (LSTM) and hydrologic engineering centre-hydrologic modelling system (HEC-HMS) for runoff modelling, *Water Resour. Manage.*, 39, 2049–2068, <https://doi.org/10.1007/s11269-024-04055-9>, 2025.

Khairudin, N. B. M., Mustapha, N. B., Aris, T. N. B. M., and Zolkepli, M. B.: Comparison of machine learning models for rainfall forecasting, in: 2020 International Conference on Computer Science and Its Application in Agriculture (ICOSICA), 2020 International Conference on Computer Science and Its Application in Agriculture (ICOSICA), Bogor, Indonesia, 1–5, <https://doi.org/10.1109/ICOSICA49951.2020.9243275>, 2020.

Khosravi, K., Golkarian, A., and Tiefenbacher, J. P.: Using optimized deep learning to predict daily streamflow: a comparison to common machine learning algorithms, *Water Resour. Manage.*, 36, 699–716, <https://doi.org/10.1007/s11269-021-03051-7>, 2022.

LeCun, Y., Boser, B., Denker, J. S., Henderson, D., Howard, R. E., Hubbard, W., and Jackel, L. D.: Backpropagation applied to handwritten zip code recognition, *Neural Comput.*, 1, 541–551, <https://doi.org/10.1162/neco.1989.1.4.541>, 1989.

Liang, W., Chen, Y., Fang, G., and Kaldybayev, A.: Machine learning method is an alternative for the hydrological model in an alpine catchment in the tianshan region, central asia, *J. Hydrol.: Reg. Stud.*, 49, 101492, <https://doi.org/10.1016/j.ejrh.2023.101492>, 2023.

Liu, H., Li, Q., Bai, Y., Yang, C., Wang, J., Zhou, Q., Hu, S., Shi, T., Liao, X., and Wu, G.: Improving satellite retrieval of oceanic particulate organic carbon concentrations using machine learning methods, *Remote Sens. Environ.*, 256, 112316, <https://doi.org/10.1016/j.rse.2021.112316>, 2021.

Maußner, C., Oberascher, M., Autengruber, A., Kahl, A., and Sitzenfrei, R.: Explainable artificial intelligence for reliable water demand forecasting to increase trust in predictions, *Water Research*, 268, 122779, <https://doi.org/10.1016/j.watres.2024.122779>, 2025.

Mirzaei, M., Yu, H., Dehghani, A., Galavi, H., Shokri, V., Mohsenzadeh Karimi, S., and Sookhak, M.: A Novel Stacked Long Short-Term Memory Approach of Deep Learning for Streamflow Simulation, *Sustainability*, 13, 13384, <https://doi.org/10.3390/su132313384>, 2021.

Piri, J., Abdollahipour, M., and Keshtegar, B.: Advanced machine learning model for prediction of drought indices using hybrid SVR-RSM, *Water Resour. Manage.*, 37, 683–712, <https://doi.org/10.1007/s11269-022-03395-8>, 2023.

Rahimzad, M., Moghaddam Nia, A., Zolfonoon, H., Soltani, J., Danandeh Mehr, A., and Kwon, H.-H.: Performance Comparison of an LSTM-based Deep Learning Model versus Conventional Machine Learning Algorithms for Streamflow Forecasting, *Water Resour Manage*, 35, 4167–4187, <https://doi.org/10.1007/s11269-021-02937-w>, 2021.

Singh, A., Imtiyaz, M., Isaac, R. K., and Denis, D. M.: Comparison of soil and water assessment tool (SWAT) and multilayer perceptron (MLP) artificial neural network for predicting sediment yield in the nagwa agricultural watershed in jharkhand, india, *Agric. Water Manage.*, 104, 113–120, <https://doi.org/10.1016/j.agwat.2011.12.005>, 2012.

Wang, D. and Lu, W.-Z.: Forecasting of ozone level in time series using MLP model with a novel hybrid training algorithm, *Atmospheric Environment*, 40, 913–924, <https://doi.org/10.1016/j.atmosenv.2005.10.042>, 2006.

Yang, Q. and Zhang, X.: Improving SWAT for simulating water and carbon fluxes of forest ecosystems, *Sci. Total Environ.*, 569–570, 1478–1488, <https://doi.org/10.1016/j.scitotenv.2016.06.238>, 2016.

Yi, Y., Liu, T., Merder, J., He, C., Bao, H., Li, P., Li, S., Shi, Q., and He, D.: Unraveling the linkages between molecular abundance and stable carbon isotope ratio in dissolved organic matter using machine learning, *Environmental Science & Technology*, <https://doi.org/10.1021/acs.est.3c00221>, 2023.

Yuan, X., Wang, J., He, D., Lu, Y., Sun, J., Li, Y., Guo, Z., Zhang, K., and Li, F.: Influence of cascade reservoir operation in the upper mekong river on the general hydrological regime: a

combined data-driven modeling approach, *Journal of Environmental Management*, 324, 116339, <https://doi.org/10.1016/j.jenvman.2022.116339>, 2022.

Zhang, X., Izaurralde, R. C., Arnold, J. G., Williams, J. R., and Srinivasan, R.: Modifying the Soil and Water Assessment Tool to simulate cropland carbon flux: Model development and initial evaluation, *Sci. Total Environ.*, 463–464, 810–822, <https://doi.org/10.1016/j.scitotenv.2013.06.056>, 2013.

Zhang, X., Liu, J., Zhu, J., Cheng, W., and Zhang, Y.: Analysis of the spatiotemporal patterns of water conservation in the Yangtze River ecological barrier zone based on the InVEST model and SWAT-BiLSTM model using fractal theory: a case study of the minjiang river basin, *Fractal Fract.*, 9, 116, <https://doi.org/10.3390/fractalfract9020116>, 2025.
